# Supplementary material
Source: PubMed Central journal article supplement (PMC2767166)
Supplement: NIHMS125951-supplement-1.pdf [file NIHMS125951-supplement-1.pdf]

## SUPPLEMENTAL FIGURE I

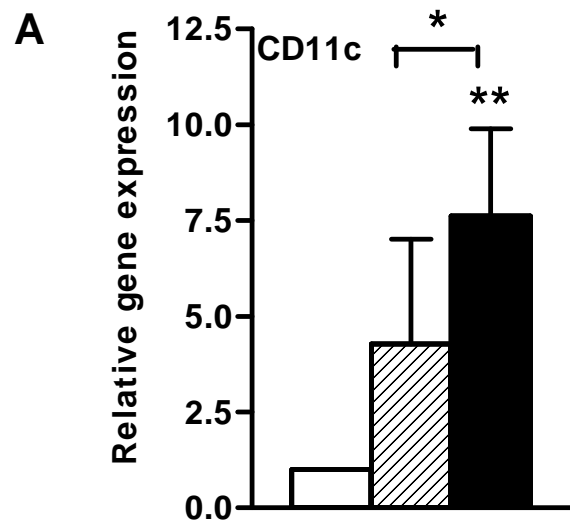

**B**

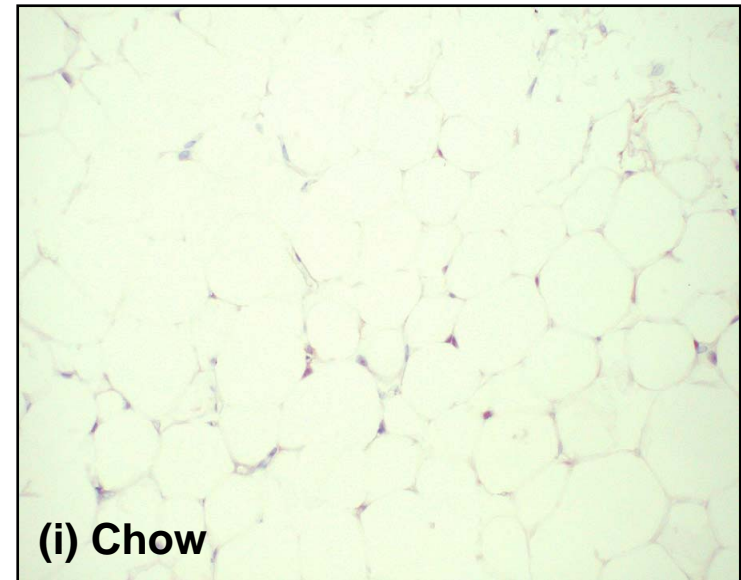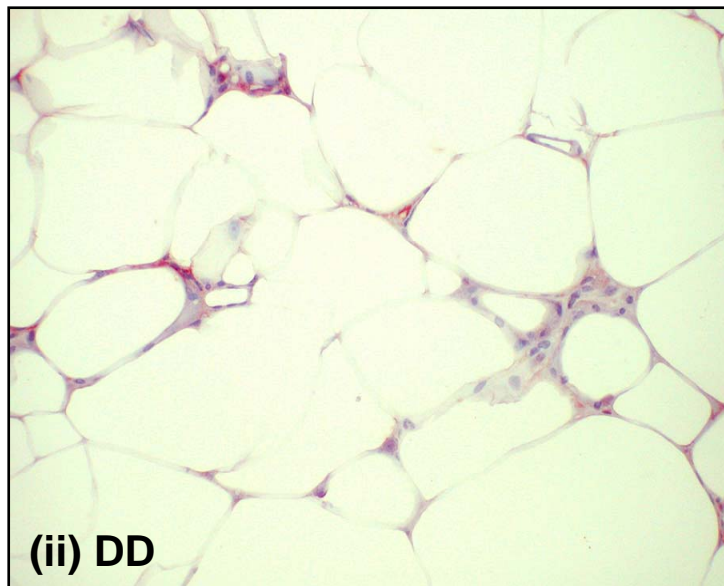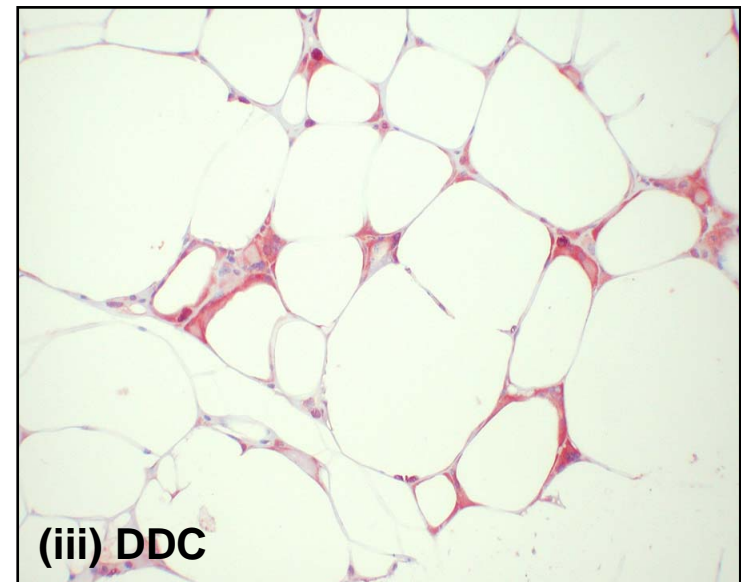

### **Supplemental Figure I legend**

(A) Increased expression of CD11c mRNA, a marker of the alternative pathway of macrophage activation, in epididymal adipose tissue of obese LDLR<sup>-/-</sup> mice. (B) Immunohistochemical localization of CD11c<sup>+</sup> cells in epididymal adipose tissue. Sections from epididymal fat pads from (i) chow, (ii) DD and (iii) DDC groups of mice were stained with anti-CD11c antibody (titer 1 in 10, Serotec, Raleigh, NC). Legend: chow (open bars), DD (hatched bars) and DDC (solid bars). \*p<0.05, \*\*p<0.01. Values represent means±SD.

## Supplemental Table I

Composition of the diets

| Diet                                                                | Composition                                                       |
|---------------------------------------------------------------------|-------------------------------------------------------------------|
| <b>Chow</b>                                                         | Carbohydrate 68%, Protein 24%, Fat 4%, Fiber 4%                   |
| <b>Diabetogenic diet (DD)</b><br><b>BioServ F1850</b>               | Carbohydrate 36.3%, Fat 35.5% as lard*, Protein 20%,<br>Fiber 0%. |
| <b>Diabetogenic diet +cholesterol</b><br><b>(DDC) BioServ F4997</b> | As in DD, with 0.15% total cholesterol                            |

All diets also contained: casein, methionine, vitamin and mineral mix.

\* Lard adds small amounts of cholesterol (0.03%) – Source: USDA National Nutrient Database

(<http://www.nal.usda.gov/fnic/foodcomp/search/>).
